# Supplementary material
Source: publisher figshare collection journal article supplement (https://karger.figshare.com/ndownloader/files/37466830)
Supplement: Supplementary file 1 [file 37466830]

# Supplementary Information

## Genetic Correlation between Chronic Pain and BPD

As previously described, LD-score regression was used to calculate genetic overlap between BPD and chronic pain, using Multisite Chronic Pain GWAS output, and output of the largest available GWAS of BPD (5) provided directly by Witt et al.

| rg (SE) | Z | P | h2obs (SE) | h2int (SE) | gcov (SE) |
| --- | --- | --- | --- | --- | --- |
| 0.39 (0.095) | 4.05 | 5E-5 | 0.075 (0.003) | 1.02 (0.01) | 0.004 (0.007) |

Supplementary Table 2: Genetic correlation between BPD and MCP. rg = genetic correlation coefficient, SE = standard error, Z = z score, P = p value, h2obs = observed SNP-heritability, h2int = LD-score regression intercept value, gcov = genetic covariance.

## Genetic Correlation between Chronic Pain and ADHD

LD-score regression (1,2) was used to calculate genetic correlation between chronic pain and ADHD, using GWAS output from recent large GWAS of ADHD (3), and of a chronic pain trait Multisite Chronic Pain (4), output which is available for public download.

| rg (SE) | Z | P | h2obs (SE) | h2int (SE) | gcov (SE) |
| --- | --- | --- | --- | --- | --- |
| 0.56 (0.03) | 18.1 | 1.5E-73 | 0.074 (0.003) | 1.02 (0.01) | 0.015 (0.008) |

Supplementary Table 3: Genetic correlation between ADHD and MCP. rg = genetic correlation coefficient, SE = standard error, Z = z score, P = p value, h2obs = observed SNP-heritability, h2int = LD-score regression intercept value, gcov = genetic covariance.

References

1. Schizophrenia Working Group of the Psychiatric Genomics Consortium, Bulik-Sullivan BK, Loh PR, Finucane HK, Ripke S, Yang J, et al. LD Score regression distinguishes confounding from polygenicity in genome-wide association studies. Nat Genet. 2015 Mar;47(3):291–5.

2. ReproGen Consortium, Psychiatric Genomics Consortium, Genetic Consortium for Anorexia Nervosa of the Wellcome Trust Case Control Consortium 3, Bulik-Sullivan B, Finucane HK, Anttila V, et al. An atlas of genetic correlations across human diseases and traits. Nat Genet. 2015 Nov;47(11):1236–41.

3. ADHD Working Group of the Psychiatric Genomics Consortium (PGC), Early Lifecourse & Genetic Epidemiology (EAGLE) Consortium, 23andMe Research Team, Demontis D, Walters RK, Martin J, et al. Discovery of the first genome-wide significant risk loci for attention deficit/hyperactivity disorder. Nat Genet. 2019 Jan;51(1):63–75.

4. Johnston KJA, Adams MJ, Nicholl BI, Ward J, Strawbridge RJ, Ferguson A, et al. Genome-wide association study of multisite chronic pain in UK Biobank. PLOS Genet. 2019 Jun 13;15(6):e1008164.

5. Bipolar Disorders Working Group of the Psychiatric Genomics Consortium, Major Depressive Disorder Working Group of the Psychiatric Genomics Consortium, Schizophrenia Working Group of the Psychiatric Genomics Consortium, Witt SH, Streit F, Jungkunz M, et al. Genome-wide association study of borderline personality disorder reveals genetic overlap with bipolar disorder, major depression and schizophrenia. Transl Psychiatry. 2017 Jun;7(6):e1155–e1155.
